# Supplementary material for: Airway Prevotella promote TLR2-dependent neutrophil activation and rapid clearance of Streptococcus pneumoniae from the lung
Source: PubMed Central journal article supplement (PMC9184549; doi:10.1038/s41467-022-31074-0), 2022-06-09
Supplement: 41467_2022_31074_MOESM1_ESM.pdf [file 41467_2022_31074_MOESM1_ESM.pdf]

**Airway *Prevotella* promote TLR2-dependent neutrophil activation and rapid clearance of *Streptococcus pneumoniae* from the lung**

## **SUPPLEMENTARY INFORMATION**

### **Supplementary Figures**

**Supplementary Figure 1**

**Supplementary Figure 2**

**Supplementary Figure 3**

**Supplementary Figure 4**

**Supplementary Figure 5**

**Supplementary Figure 6**

**Supplementary Figure 7**

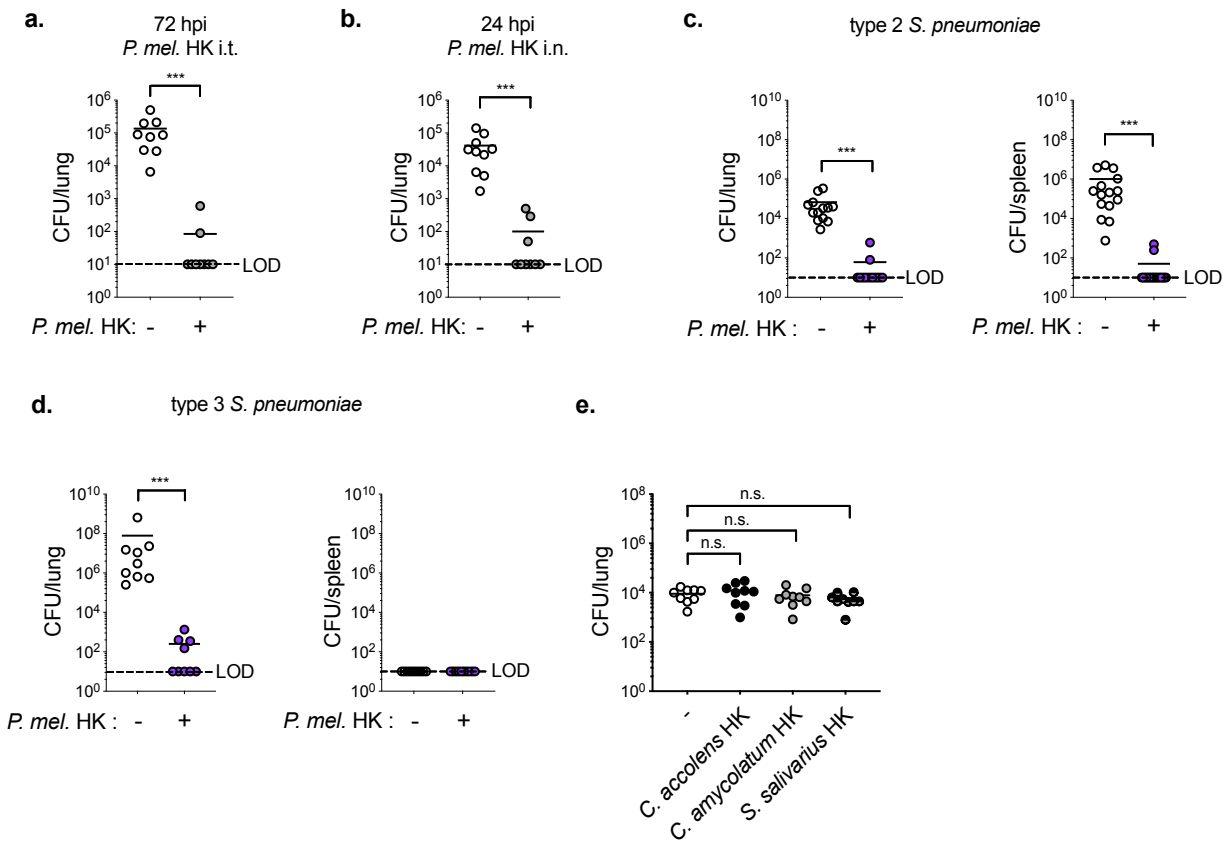

**Supplementary Figure 1.** Exposure to airway *P. melaninogenica* (*P. mel.*) heat-killed (HK) i.t. or i.n. induces clearance of *S. pneumoniae*. **a** Lung type 2 *S. pneumoniae* burdens in mice exposed to PBS (-) or *P. melaninogenica* (*P. mel.*) strain 25845 HK i.t. prior to 72 h *S. pneumoniae* infection,  $5 \times 10^6$  CFU/mouse (n= 9 mice/group). **b** Lung *S. pneumoniae* burdens in mice exposed to PBS (-) or *P. mel.* HK i.n. prior to 24 h *S. pneumoniae* infection (n= 10 mice/group). **c - d** Tissue burdens of type 2 *S. pneumoniae* strain D39 (n= 13 mice/group) (**c**) or type 3 *S. pneumoniae* strain ATCC 6303 (n= 9 mice/group) (**d**) following exposure to PBS (-) or *P. mel.* HK i.t. prior to 24 h *S. pneumoniae* infection,  $5 \times 10^6$  CFU/mouse. **e** Lung type 2 *S. pneumoniae* burdens in mice exposed to PBS (-), *C. accolens* HK, *C. amycolatum* HK, or *S. salivarius* HK i.t. ( $10^7$  CFU equivalents/mouse each) i.t. prior to 24 h *S. pneumoniae* infection,  $5 \times 10^6$  CFU/mouse (n= 9 mice/group). LOD = limit of detection. Data are pooled from 3

independent experiments, displayed as mean  $\pm$  SEM. For (a),  $***p < .0001$ , two-tailed Mann-Whitney U test, (b)  $***p < .0001$ , two-tailed Mann-Whitney U test, (c)  $***p < .0001$ , two-tailed Mann-Whitney U test, (d)  $***p < .0001$ , two-tailed Mann-Whitney U test, (e) from left to right  $p > .9999$ ,  $p > .9999$ ,  $p = .5156$ , Kruskal-Wallis with Dunn's *post-hoc* test. Source data are provided as a Source Data file.

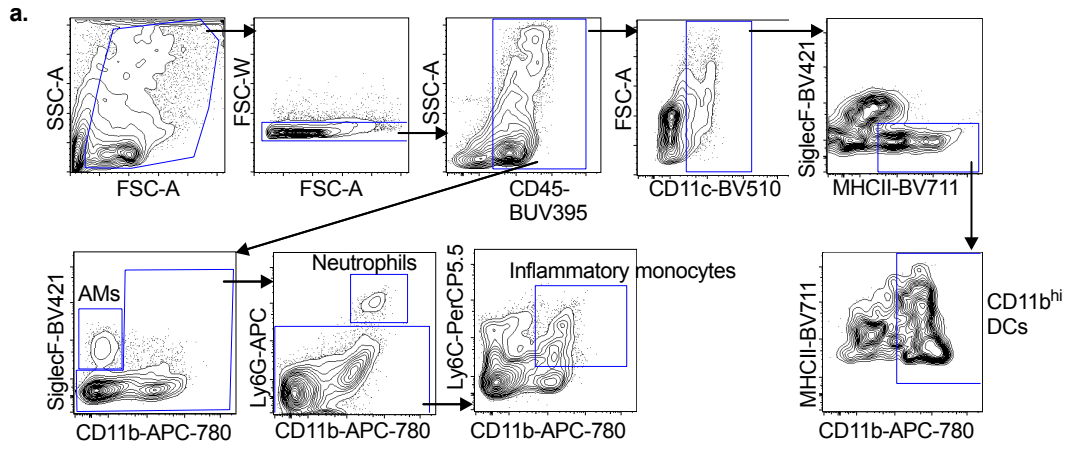

**b.** Inflammatory monocytes -uninfected mice-

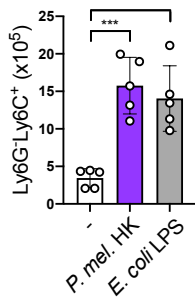

**c.** Inflammatory monocyte TNF $\alpha$  -uninfected mice-

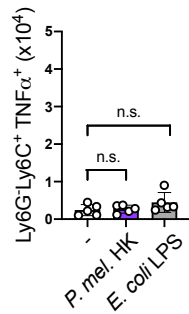

**d.** CD11b<sup>hi</sup> DCs -uninfected mice-

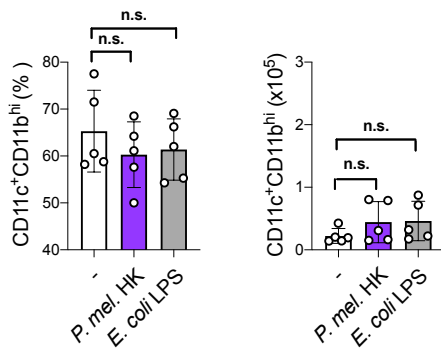

**e.** CD11b<sup>hi</sup> DC TNF $\alpha$  -uninfected mice-

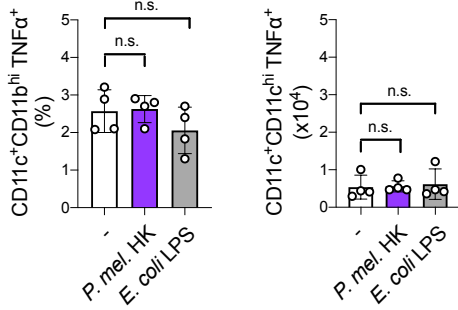

**f.** AMs -uninfected mice-

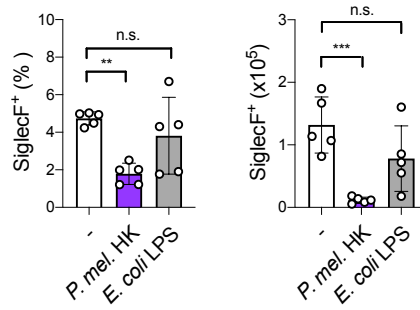

**g.** AM TNF $\alpha$  -uninfected mice-

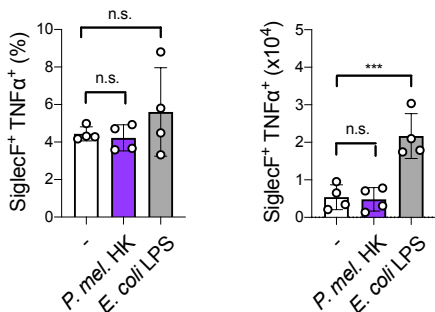

**h.**

BAL TNF $\alpha$  (pg/mL)

P. mel. HK: + + -  
anti-Ly6G: - + -

**Supplementary Figure 2.** Lung myeloid cell responses to *P. melaninogenica* (*P. mel.*) lung exposure. **a** Flow cytometry gating strategy defining neutrophils, alveolar macrophages (AMs), inflammatory monocytes, and CD11b<sup>hi</sup> dendritic cells (DCs) from single cell lung populations. This gating strategy was used for all flow cytometry analysis. **b - g** Total cell number of inflammatory monocytes (**b**), inflammatory monocyte TNF $\alpha$  (**c**), percentage and total cell number of CD11b<sup>hi</sup> DCs (**d**), CD11b<sup>hi</sup> DC TNF $\alpha$  (**e**), AMs (**f**), and AM TNF $\alpha$  (**g**) detected by intracellular flow cytometry in mice treated with PBS (-), *P. mel.* strain 25845 heat-killed (HK), or *E. coli* lipopolysaccharide (LPS) i.t. for 24 h. **h** Bronchoalveolar lavage (BAL) TNF $\alpha$  detected in mice with or without exposure to *P. mel.* HK i.t. or anti-Ly6G antibodies (200  $\mu$ g/mouse) i.p. for 24 h. Data are representative from one of four independent experiments with n= 5 mice/group (**b - g**) or pooled from two independent experiments with n= 3 mice/group (replicate 1) or n= 4 mice/group (replicate 2) (**h**), displayed as mean  $\pm$  SEM. For (**b**) from left to right \*\*\* $p$ =.0002, \*\*\* $p$ =.0007, one-way ANOVA with Dunnett's *post-hoc* test, (**c**) from left to right  $p$ =.9681,  $p$ =.1850, one-way ANOVA with Dunnett's *post-hoc* test, (**d**) from left to right  $p$ =.4835,  $p$ =.6292,  $p$ =.3598,  $p$ =.3099, one-way ANOVA with Dunnett's *post-hoc* test, (**e**) from left to right  $p$ =.9842,  $p$ =.3316,  $p$ =.3396,  $p$ >.9999, one-way ANOVA with Dunnett's *post-hoc* test, (**f**) from left to right \*\* $p$ =.0052,  $p$ =.4202, \*\*\* $p$ =.0009,  $p$ =.0968, one-way ANOVA with Dunnett's *post-hoc* test, (**g**) from left to right  $p$ =.9676,  $p$ =.4429,  $p$ =.0968, \*\*\* $p$ =.0009, one-way ANOVA with Dunnett's *post-hoc* test, (**h**) \*\*\* $p$ <.0001, one-way ANOVA with Dunnett's *post-hoc* test. Source data are provided as a Source Data file.

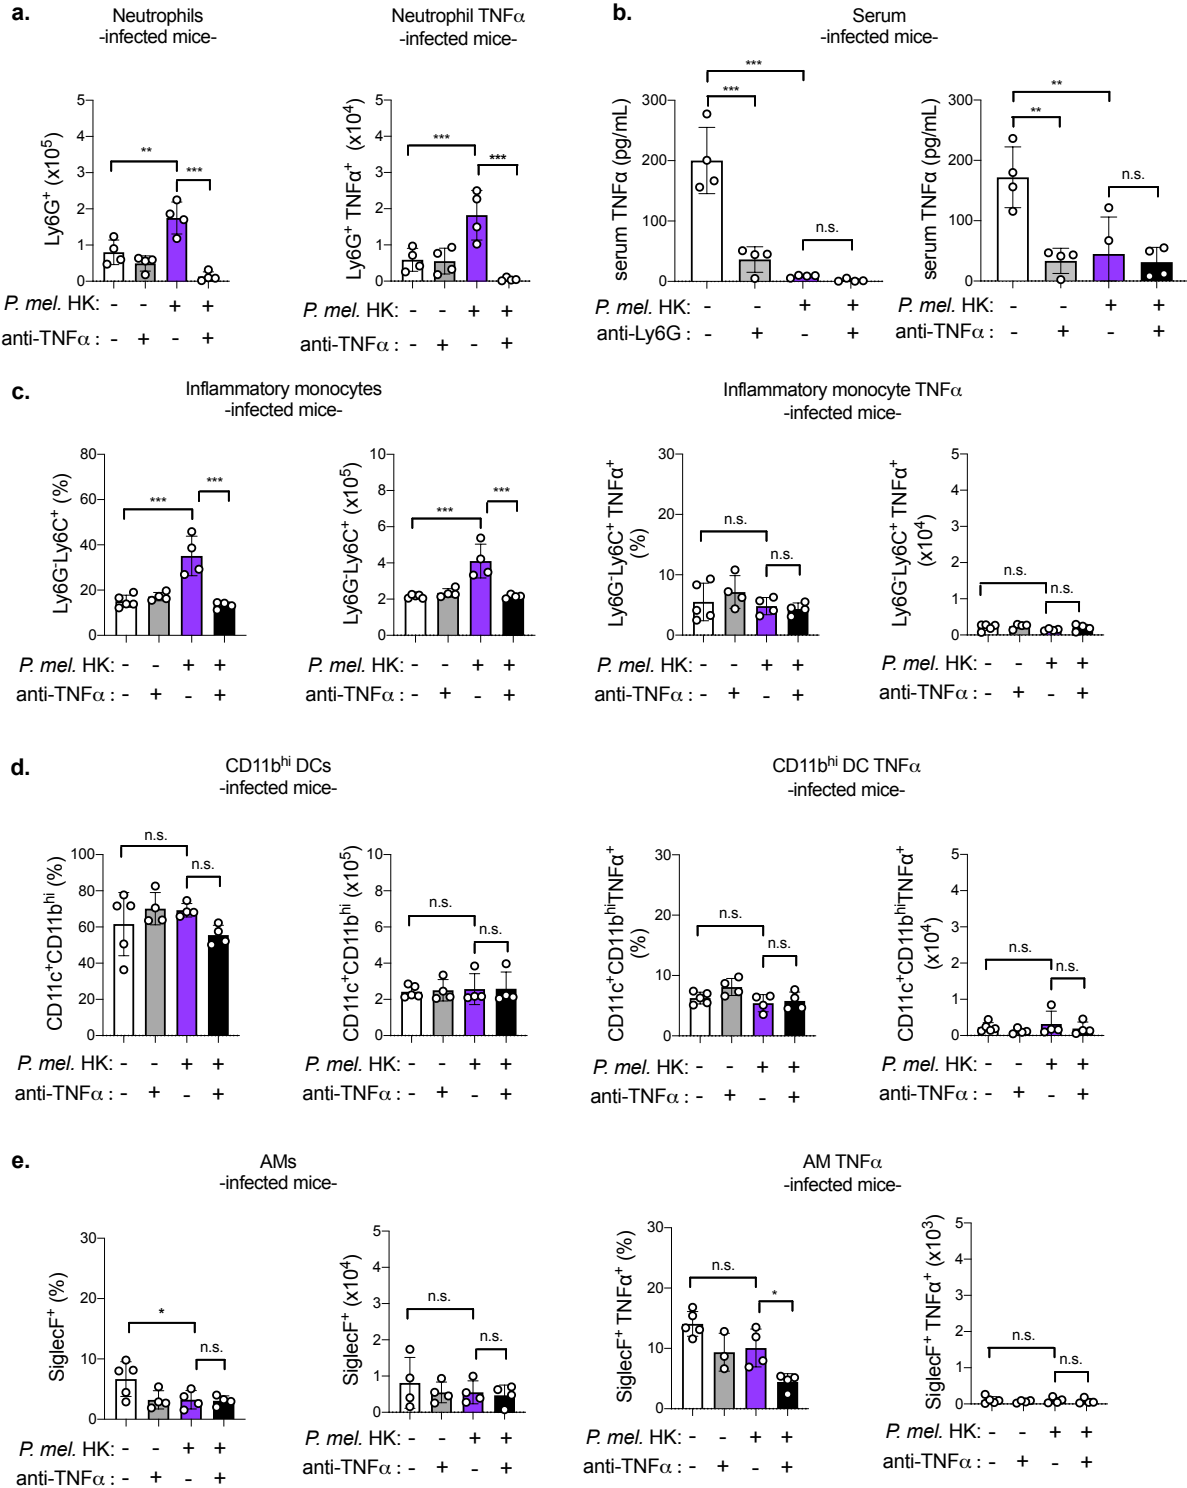

**Supplementary Figure 3.** Systemic and lung myeloid cell responses in neutrophil and TNF $\alpha$  depleted mice exposed to *P. melaninogenica* (*P. mel.*) prior to *S. pneumoniae* infection. **a** Total

cell number of neutrophils and neutrophil TNF $\alpha$  in mice treated with isotype control antibody or anti-TNF $\alpha$  i.p. (200  $\mu$ g/mouse) together with either PBS (-) or *P. mel.* strain 25845 heat-killed (HK) i.t. prior to 24 h type 2 *S. pneumoniae* infection, 5x10<sup>6</sup> CFU/mouse (n= 4 mice/group). **b** Serum TNF $\alpha$  detected in mice treated with isotype control antibody, anti-Ly6G or anti-TNF $\alpha$  i.p. (200  $\mu$ g/mouse) together with either PBS (-) or *P. mel.* HK i.t. prior to 24 h *S. pneumoniae* infection (n= 4 mice/group). **c - e** Percentage and total cell number of inflammatory monocytes and inflammatory monocyte TNF $\alpha$  (**c**), percentage and total cell number of CD11b<sup>hi</sup> DCs and CD11b<sup>hi</sup> DC TNF $\alpha$  (**d**), and percentage and total cell number of alveolar macrophages (AMs) and AM TNF $\alpha$  (**e**), detected by intracellular flow cytometry in mice treated with isotype control antibody or anti-TNF $\alpha$  i.p. together with either PBS (-) or *P. mel.* HK i.t. prior to 24 h *S. pneumoniae* infection (n= 5 mice/group). Data are representative from one of four independent experiments, displayed as mean  $\pm$  SEM. For (**a**) from left to right \*\* $p$ =.0018, \*\*\* $p$ <.0001, \*\*\* $p$ <.0009, \*\*\* $p$ <.0001, one-way ANOVA with Sidak's *post-hoc* test, (**b**) from left to right \*\*\* $p$ <.0001, \*\*\* $p$ <.0001,  $p$ =.9882, \*\* $p$ =.0031, \*\* $p$ =.0059,  $p$ =.9691, one-way ANOVA with Tukey's *post-hoc* test, (**c**) from left to right \*\*\* $p$ <.0001, \*\*\* $p$ <.0001, \*\*\* $p$ <.0001, \*\*\* $p$ =.0001,  $p$ =.8872,  $p$ =.9479,  $p$ =.3253,  $p$ =.5295, one-way ANOVA with Sidak's *post-hoc* test, (**d**) from left to right  $p$ =.5388,  $p$ =.1945,  $p$ =.9421,  $p$ =.9989,  $p$ =.5829,  $p$ =.9088,  $p$ =.7734,  $p$ =.6495, one-way ANOVA with Sidak's *post-hoc* test, (**e**) from left to right \* $p$ =.0414,  $p$ =.9898,  $p$ =.6551,  $p$ =.9580,  $p$ =.0617, \* $p$ =.0137,  $p$ =.9887,  $p$ =.9038, one-way ANOVA with Sidak's *post-hoc* test. Source data are provided as a Source Data file.

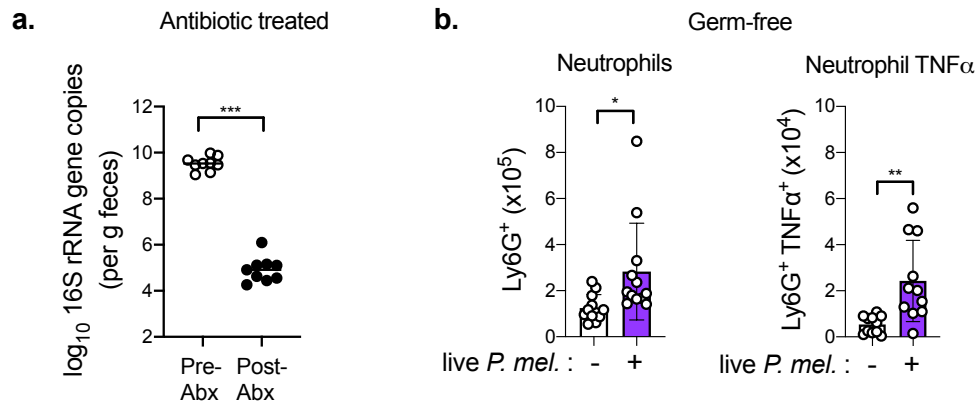

**Supplementary Figure 4.** Antibiotic depletion of the microbiome and *P. melaninogenica* (*P. mel.*)-induced neutrophil recruitment and activation in Germ-free mice. **a** 16S rRNA gene copies per gram of feces from naïve mice (pre-Abx) and following 7 days on water containing an antibiotic cocktail (post-Abx) detected by qPCR (n= 9 mice/group). **b** Total cell number of neutrophils and neutrophil TNF $\alpha$  detected by intracellular flow cytometry in Germ-free mice treated with either PBS (-) or live *P. mel.* strain 25845 i.t. prior to 24 h type 2 *S. pneumoniae* infection, 10<sup>6</sup> CFU/mouse (n= 11 mice/group). Data are pooled three independent experiments, displayed as mean  $\pm$  SEM. For **(a)** \*\*\* $p$ =.0004, two-tailed t test, **(b)** from left to right \* $p$ =.0197, \*\* $p$ =.0024, two-tailed t test. Source data are provided as a Source Data file.



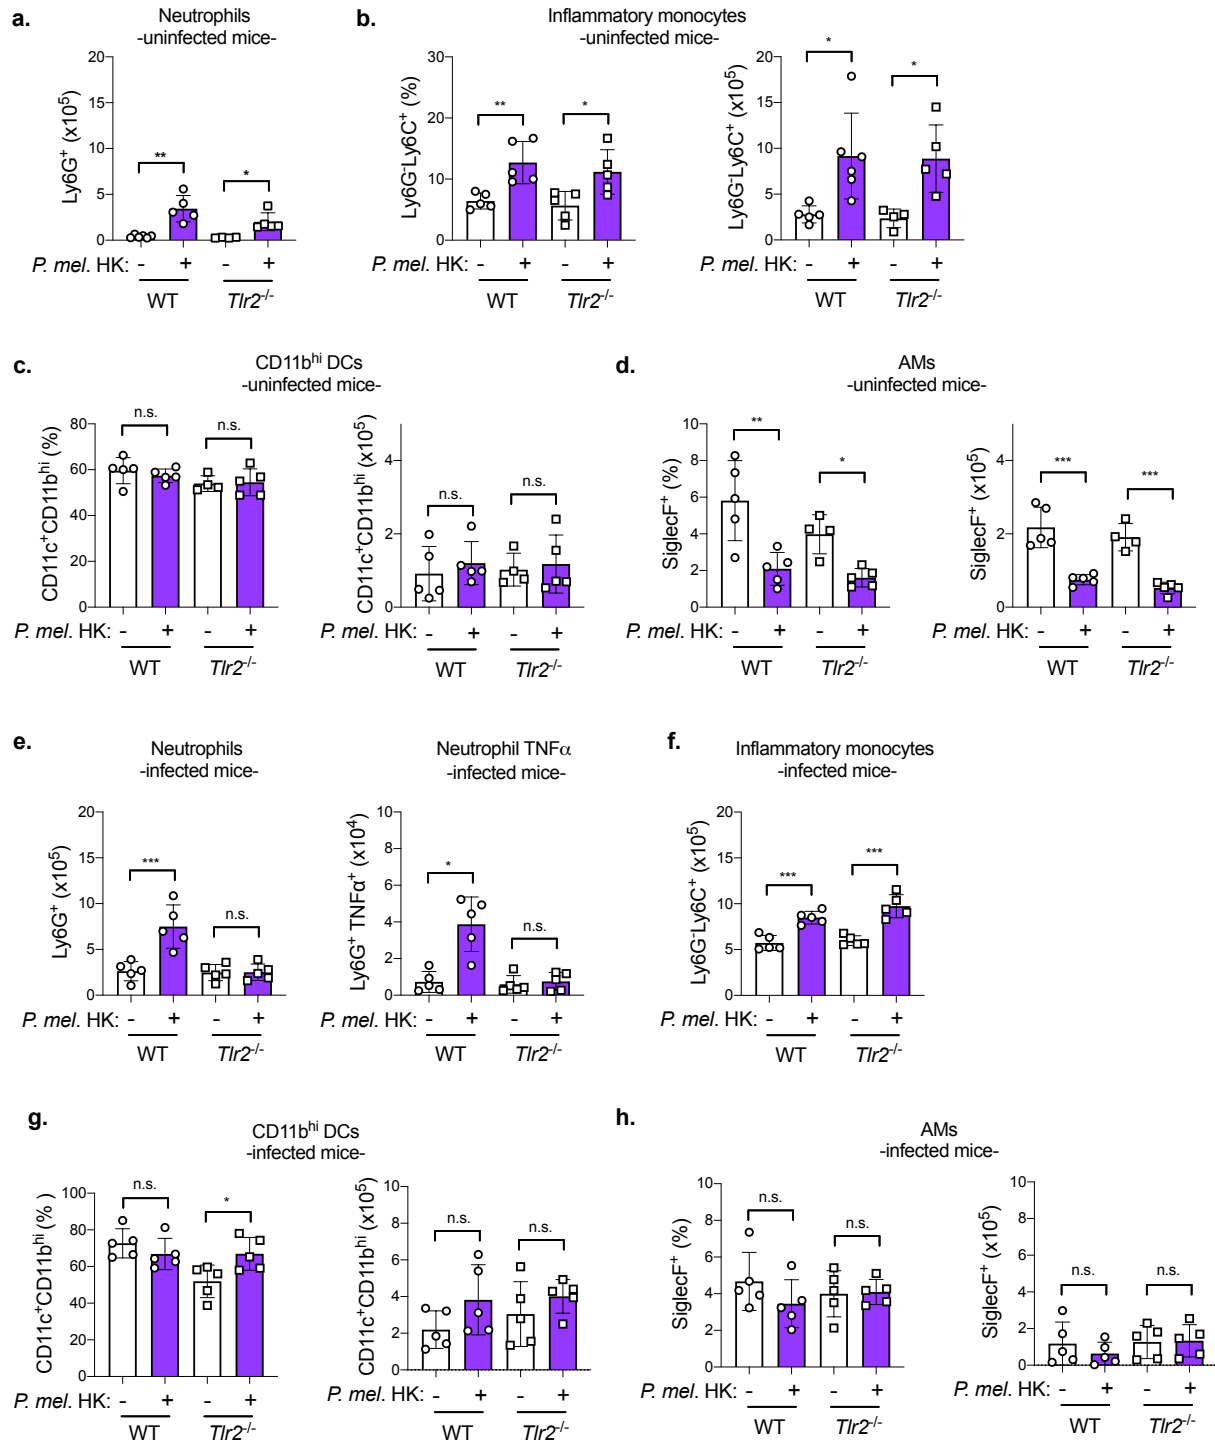

**Supplementary Figure 5.** The impact of TLR2 deficiency on the lung myeloid cell response to *P. melaninogenica* (*P. mel.*) with and without *S. pneumoniae* infection. **a - d** Total cell number of neutrophils (**a**), percentage and total cell number of inflammatory monocytes (**b**), percentage

and total cell number of CD11b<sup>hi</sup> DCs (c), and percentage and total cell number of alveolar macrophages (AMs) (d) in WT or *Tlr2*<sup>-/-</sup> mice treated with either PBS (-) or *P. mel.* strain 25845 heat-killed (HK) i.t. for 24 h (n= 5 mice/group for all except *Tlr2*<sup>-/-</sup> mice treated with PBS, n= 4 mice/group). e - h Total cell number of neutrophils and neutrophil TNF $\alpha$  (e), total cell number of inflammatory monocytes (f), percentage and total cell number of CD11b<sup>hi</sup> DCs (g), and percentage and total cell number of AMs (h) in WT or *Tlr2*<sup>-/-</sup> mice treated with either PBS (-) or *P. mel.* HK i.t. prior to 24 h type 2 *S. pneumoniae* infection, 5x10<sup>6</sup> CFU/mouse (n= 5 mice/group). Data are representative from one of four independent experiments, displayed as mean  $\pm$  SEM. For (a) \*\*p=.0040 (WT), \*p=.0368 (*Tlr2*<sup>-/-</sup>), Kruskal-Wallis with Dunn's *post-hoc* test, (b) from left to right \*\*p=.0059, \*p=.0145, \*p=.0106, \*p=.0177, one-way ANOVA with Sidak's *post-hoc* test, (c) from left to right p=.7207, p=.9819, p=.7592, p=.9317, one-way ANOVA with Sidak's *post-hoc* test, (d) from left to right \*\*p=.0010, \*p=.0358, \*\*\*p<.0001, \*\*\*p<.0001, one-way ANOVA with Sidak's *post-hoc* test, (e) from left to right \*\*\*p=.0001, p=.9990, one-way ANOVA with Sidak's *post-hoc* test, \*p=.0279, p>.9999, Kruskal-Wallis with Dunn's *post-hoc* test, (f) \*\*\*p=.0002 (WT), \*\*\*p<.0001 (*Tlr2*<sup>-/-</sup>), one-way ANOVA with Sidak's *post-hoc* test, (g) from left to right p=.5095, \*p=.0273, p=.1896, p=.5296, one-way ANOVA with Sidak's *post-hoc* test, (h) from left to right p=.2665, p=.9912, p=.5916, p=.9922, one-way ANOVA with Sidak's *post-hoc* test. Source data are provided as a Source Data file.

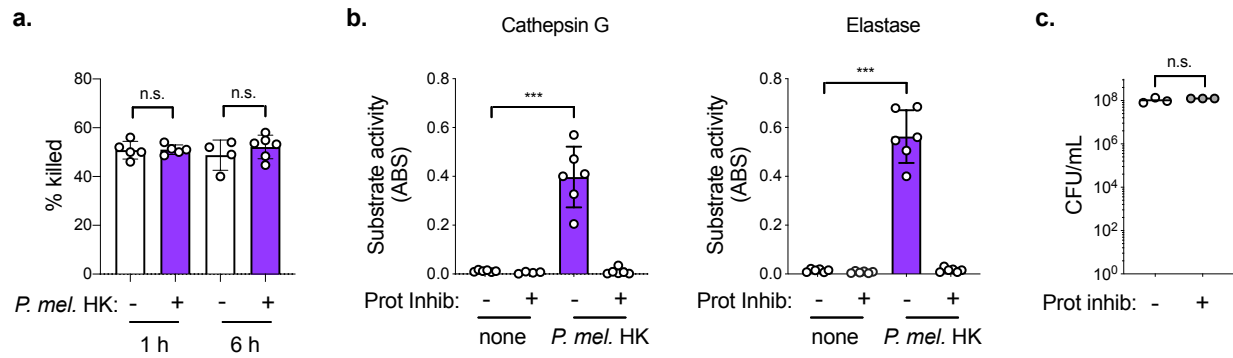

**Supplementary Figure 6.** *P. melaninogenica* (*P. mel.*) enhances serine protease-mediated killing of *S. pneumoniae* by lung neutrophils. **a** Percent of type 2 *S. pneumoniae* killed by bone marrow (BM) neutrophils from naïve mice exposed to either PBS (-) or *P. melaninogenica* (*P. mel.*) HK at a 1:1 ratio *in vitro* for 1 h or 6 h prior to incubation with *S. pneumoniae* opsonized by 3% fresh mouse serum (n= 3 independent experiments/group). **b** Serine protease activity for cathepsin G and elastase +/- protease inhibitor cocktail (Prot Inhib) detected by substrate cleavage for lung neutrophils purified from WT mice exposed to either PBS (none) or *P. mel.* heat-killed (HK) i.t. for 24 h (n= cells isolated from 6 mice/group). **c** Burden of *S. pneumoniae* detected 24 h following 1 h incubation with protease inhibitor cocktail (n= 3 independent experiments/group). Data are pooled from three independent experiments, displayed as mean  $\pm$  SEM. For (a)  $p=$ .9967 (1 h),  $p=$ .4267 (6 h), one-way ANOVA with Sidak's *post-hoc* test, (b) \*\*\* $p$ <.0001 (Cathepsin G), \*\*\* $p$ <.0001 (Elastase), two-tailed t test, (c)  $p=$ .2573, two-tailed t test. Source data are provided as a Source Data file.

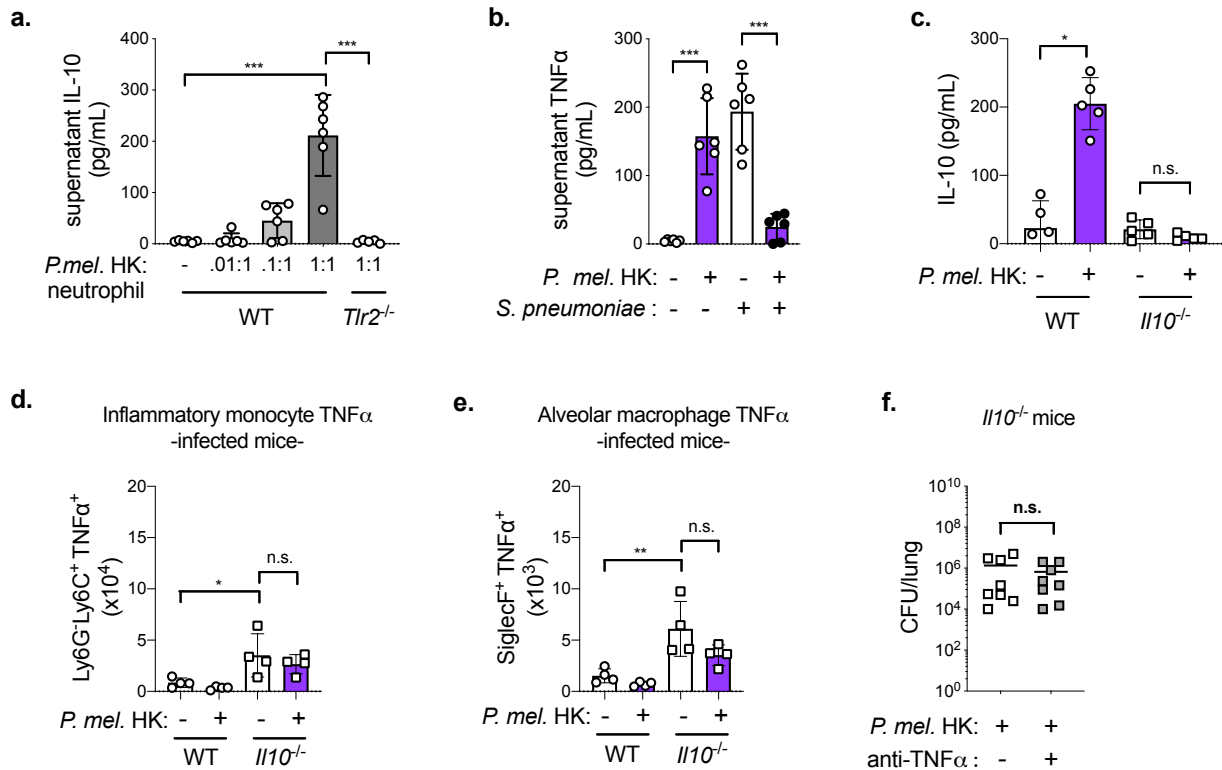

**Supplementary Figure 7.** *P. melaninogenica* (*P. mel.*) induces neutrophil IL-10 and co-infection limits neutrophil TNF $\alpha$  secretion. **a** Supernatant IL-10 detected 24 h following incubation of bone marrow (BM) neutrophils purified from naïve WT or *Tlr2*<sup>-/-</sup> mice with *P. mel.* strain 25845 heat-killed (HK) at the indicated ratios (n= 3 independent experiments/group). **b** Supernatant TNF $\alpha$  detected 24 h following incubation of BM neutrophils with either PBS (-), *P. mel.* HK, or infected with type 2 *S. pneumoniae* for 1 h (n= 3 independent experiments/group). **c - e** Serum IL-10 (**c**), total cell numbers of inflammatory monocyte TNF $\alpha$  (**d**), and total cell numbers of alveolar macrophage (AM) TNF $\alpha$  (**e**) detected by intracellular flow cytometry in WT or *Il10*<sup>-/-</sup> mice exposed to PBS (-, n= 4 mice/group) or *P. mel.* HK i.t. (n= 5 mice/group) prior to 24 h *S. pneumoniae* infection, 5x10<sup>6</sup> CFU/mouse. **f** Lung burdens of *S. pneumoniae* in *Il10*<sup>-/-</sup> mice treated with isotype control antibody or anti-TNF $\alpha$  (200  $\mu$ g/mouse) i.p. together with *P. mel.* HK i.t. prior to 24 h *S. pneumoniae* infection (n= 8 mice/group). Data are pooled from three

independent experiments (**a - b**), representative from one of three independent experiments (**c - e**), or pooled from two independent experiments (**f**). Data are displayed as mean  $\pm$  SEM. For (**a**) from left to right  $***p < .0001$ ,  $***p < .0001$ , one-way ANOVA with Tukey's *post-hoc* test, (**b**)  $***p < .0001$ , one-way ANOVA with Tukey's *post-hoc* test, (**c**)  $*p = .0431$  (WT),  $p = .6196$  (*Il10<sup>-/-</sup>*), Kruskal-Wallis with Dunn's *post-hoc* test, (**d**) from left to right  $*p = .0151$ ,  $p = .5387$ , one-way ANOVA with Sidak's *post-hoc* test, (**e**) from left to right  $**p = .0018$ ,  $p = .0600$ , one-way ANOVA with Sidak's *post-hoc* test, (**f**)  $p = .8581$ , two-tailed Mann-Whitney U test. Source data are provided as a Source Data file.
